1 **Single AAV-mediated mutation replacement genome editing in limited number of**

2 **photoreceptors mediate marked visual restoration**

3

4 Short title: Single AAV MMEJ genome editing

5

6 Koji M Nishiguchi,<sup>1,2†\*</sup> Kosuke Fujita,<sup>3†</sup> Fuyuki Miya,<sup>4</sup> Shota Katayama,<sup>1</sup> Toru Nakazawa<sup>1,2,3\*</sup>

7

8 <sup>1</sup> Department of Advanced Ophthalmic Medicine, Tohoku University Graduate School of

9 Medicine, Sendai 980-8574, Japan

10 <sup>2</sup> Department of Ophthalmology, Tohoku University Graduate School of Medicine, Sendai

11 980-8574, Japan

12 <sup>3</sup> Department of Ophthalmic Imaging and Information Analytics, Tohoku University Graduate

13 School of Medicine, Sendai 980-8574, Japan

14 <sup>4</sup> Department of Medical Science Mathematics, Medical Research Institute, Tokyo Medical

15 and Dental University, Tokyo 113-8510, Japan

16

17 <sup>†</sup>These authors contributed equally to the work.

18 <sup>\*</sup>Corresponding authors. Tel: +81-22-717-7294

19 Koji M Nishiguchi, E-mail: [nishiguchi@oph.med.tohoku.ac.jp](mailto:nishiguchi@oph.med.tohoku.ac.jp)

20 Toru Nakazawa, E-mail: [ntoru@oph.med.tohoku.ac.jp](mailto:ntoru@oph.med.tohoku.ac.jp)

21

22 **Abstract**

23 **Supplementing wildtype copies of functionally defective genes (gene**  
24 **supplementation) with adeno-associated virus (AAV) is a strategy being explored**  
25 **clinically for various retinal dystrophies. However, the low cargo limit of this vector**  
26 **(~5,000 bps) allows its use in only a fraction of patients with mutations in relatively**  
27 **small pathogenic genes. To overcome this issue, we developed a single AAV platform**  
28 **that allows local replacement of a mutated sequence with its wildtype counterpart,**  
29 **based on combined CRISPR-Cas9 and micro-homology-mediated end-joining (MMEJ).**  
30 **In blind mice, the mutation replacement rescued ~10% of photoreceptors, resulting in**  
31 **an incredible ~10,000-fold improvement in light sensitivity and increasing visual**  
32 **acuity to ~60% of the controls. Surprisingly, these effects were comparable to**  
33 **restoration mediated by gene supplementation, which targets ~70% of**  
34 **photoreceptors. This strategy paves the way for treatment of inherited disorders**  
35 **caused by mutations in larger genes, for which conventional gene supplementation**  
36 **therapy is not currently feasible.**

37

38 **Introduction**

39 Delivery of wild-type copies of the defective gene (gene supplementation) in retinal  
40 dystrophy patients with loss of function mutations via adeno-associated virus (AAV) has  
41 shown promising therapeutic effects. <sup>1</sup> However, the stringent cargo limit of the vector (4,700  
42 - 5,000 bps) <sup>2</sup> allows its application to only a fraction of the patients with mutations in  
43 relatively small pathogenic genes. For example, according to our recent genetic survey of  
44 Japanese patients with retinitis pigmentosa, the most frequent inherited retinal degeneration,  
45 more than 90% were shown to have mutations in larger genes untreatable by AAV-mediated  
46 gene supplementation. <sup>3</sup> Thus, vast majority of these patients require other approaches  
47 other than AAV-mediated gene supplementation to treat their mutations, except for rare  
48 exceptions.<sup>4</sup> Recently, the CRISPR-Cas9-mediated allele knock-out genome editing  
49 strategy, based on non-homologous end joining (NHEJ) has been successfully applied to  
50 correct gain-of-function mutations via AAV.<sup>5,6,7,8</sup> One of the unique advantages of the  
51 genome editing approach is that it allows local treatment of the genome, such that the  
52 approach does not depend on the size of the target gene. However, genome editing for  
53 loss-of-function mutations in larger genes that require local replacement of the mutated  
54 sequence with a wildtype counterpart (mutation replacement) has not been successful in

55 treatment of neuronal disorders primarily affecting neurons, due to its low editing efficiency.<sup>9</sup>  
56 <sup>10, 11, 12</sup> This could be partly attributed to the requirement of two separate vectors for this  
57 approach, in which various components including Cas9, two guide RNAs (gRNAs) and U6  
58 promoters, and DNA template and flanking homology arms all needs to be contained.  
59 Recently, extremely small homology arms of ~20 bps (microhomology arms), relative to the  
60 conventional homology arms sized a few hundred bps or more, have been successfully  
61 applied to edit mammalian genome *in vivo*.<sup>13</sup> This system termed microhomology-mediated  
62 end joining (MMEJ) reportedly allows precise integration of a DNA donor in a desired  
63 genomic location.<sup>14</sup> In this study, we aim to develop a single AAV vector platform for  
64 mutation replacement genome editing using MMEJ. Through application of the platform in  
65 mouse models of retinal dystrophy, we show that a robust restoration of the visual function  
66 can be achieved, supported by an improved genome editing efficacy.

67

## 68 **Results**

69 First, we generated mutants of preexisting retina-specific promoters and conducted  
70 *in vivo* AAV reporter assays (Fig. S1a-e and Table S1). The smallest promoter that  
71 maintained neural retina-specific transcription was a 93-bp mutant *GRK1* promoter with  
72 reporter expression in 65.5% of the photoreceptors, including the cones (Fig. S1c). This was

73 used to drive SaCas9 (3.2 Kb) expression. We tested our single-AAV vector platform in  
74 *Gnat1*<sup>IRD2/IRD2</sup>/*Pde6c*<sup>cpfl1/cpfl1</sup> mice; the *Gnat1* and *Pde6c* defects in these mice cause  
75 blindness due to a functional lack of rods and cones,<sup>15</sup> leaving behind only a residual cortical  
76 light response to brightest flashes<sup>16</sup> mediated by *Gnat2*.<sup>17</sup> This allows the clear observation  
77 of therapeutic effects. We used our platform to correct *IRD2* mutations in *Gnat1*; these  
78 mutations constitute a homozygous 59-bp deletion in intron 4 (Fig. S2a), preventing protein  
79 expression in the rods<sup>18</sup>, which comprise ~75% of murine retinal cells.<sup>19</sup> Six gRNAs  
80 designed to flank the mutation were assessed with a T7 endonuclease 1 (T7E1) assay (Fig.  
81 S2b,c and Table S2). The gRNA pair (1+4) that excised the mutation most efficiently was  
82 selected.

83 The constructed prototype single-AAV vector (MMEJ vector; Fig 1a and Fig.  
84 S3a,f,g) that allows mutation replacement via MMEJ was then injected sub-retinally in  
85 6M-old blind mice. Mutations of up to a few bp were designed in the gRNA target sites  
86 flanking the donor sequence to prevent repeated cleavage of the sites after successful  
87 mutation replacement. At this age, the rods show little sign of degeneration.<sup>20</sup> Six weeks  
88 later, histology showed scattered GNAT1-positive photoreceptors, indicating successful  
89 genome editing (Fig. 1b). Injection of a modified MMEJ vector that tagged SaCas9  
90 expression with a fluorescent reporter (Fig. S3b) showed GNAT1 immunoreactivity

91 exclusively in the cells and retinal area with reporter expression (Fig. 1c), suggesting a  
92 causal relationship between SaCas9 and GNAT1 expression. Furthermore, histology  
93 showed no sign of accelerated cone degeneration as a side effect of the treatment, although  
94 we have no evidence that genome editing occurs in cones (Fig. 1d and S1c). Next, we  
95 investigated the effects of *Gnat1* mutation replacement on mRNA expression of related  
96 genes (Fig. 1e). The expression of *Rho* and *Pde6b*, both of which cooperate with *Gnat1* to  
97 signal phototransduction in rods,<sup>21</sup> and of *Rcvrn*, a marker of both rods and cones, were not  
98 reduced in the eyes of untreated blind mice and remained unchanged after the treatment.  
99 However, the expression of the rod bipolar cell marker *Pkca*, which had been reduced to  
100 29.3% of its expression in the controls, nearly doubled to 50.0% following the treatment,  
101 indicating that the treated rods interacted with the downstream bipolar cells. Meanwhile, the  
102 absolute editing efficiency deduced from *Gnat1* mRNA expression was ~12.7% (Fig. 1f). In  
103 contrast, when microhomology arms (MHAs) or gRNA target sites flanking the donor  
104 sequence were removed from the prototype MMEJ vector (Fig. S3c,d), the efficiency was  
105 dramatically reduced, consistent with mutation replacement mediated by MMEJ.  
106 Furthermore, testing with a 6-Hz flicker electroretinogram (ERG), which reflects the number  
107 of functional photoreceptors, revealed responses averaging 11.2% of that in the control mice  
108 (Fig. 1g). The effect was severely diminished after the intravitreal injection of LAP4, a

109 glutamate analog that blocks synaptic transmission between the photoreceptors and  
110 ON-bipolar cells.<sup>20</sup> This is consistent with functional connection of the treated rods with  
111 downstream neural circuits. The result was further corroborated by a single-flash ERG  
112 paradigm: mice pretreated with MMEJ vector and then injected with LAP4 showed reduced  
113 b-waves generated by the ON bipolar cells including the rod bipolar cells, and preserved  
114 a-waves driven by rods (Fig. 1h). Again, the modified vectors without MHAs or gRNA target  
115 sites, showed no discernable response in either ERG protocol, supporting the specific role  
116 of MMEJ in mutation replacement. These results were consistent with ~10% success in  
117 mutation replacement via MMEJ in the rods and functional integration of the treated cells  
118 into the retinal circuitry.

119           Next, we carried out PCR-based sequencing analyses of the on-target site *in vitro*  
120 (Fig. S4) and *in vivo* (Fig. 2). The *in vitro* analysis showed a 10.3% success rate after MMEJ  
121 mutation replacement, higher than the rate of 3.8% with a different mutation replacement  
122 strategy (homology-independent targeted integration, HITI; Fig. S3e-g and S4a,b).<sup>9</sup> Similarly,  
123 the success rate of *in vivo* mutation replacement in the genome-edited rods was 11.1% and  
124 4.5% for the MMEJ and HITI approaches, respectively, at 1M post-treatment (Fig. 2a).  
125 Gross estimate of absolute successful editing rate in the rods, uncorrected and partially  
126 corrected also for the sensitivity of the sequence analysis, was 4.7% and 9.1% for the MMEJ

127 approach (Fig. 2b-d). In both the *in vitro* and *in vivo* analyses, MMEJ vectors without MHAs  
128 or gRNA target sites did not result in any successful mutation replacements. Meanwhile, the  
129 major editing outcome was deletion caused by a simple excision of the *IRD2* mutation for  
130 both *in vitro* and *in vivo* analyses. Unplanned *in vivo* on-target integrations of the AAV  
131 genome were present, but at a lower rate than deletions. Extended *in vivo* on-target site  
132 sequencing and mRNA analysis (Fig. 2a-f) conducted 3M post-treatment revealed a similar  
133 absolute success rate (corrected editing rate of 11.0%) accompanied by the sustained or  
134 slightly reduced expression of SaCas9 mRNA and gRNAs (Fig. 2g,h), demonstrating the  
135 stability of the platform. The result also indicates that the treatment effect nearly plateaus by  
136 1M. Although accurate estimation by PCR based sequencing is difficult, the results support  
137 the stable ~10% absolute editing efficiency at the genome level in the rods with  
138 MMEJ-mediated mutation replacement.

139           Then, off-target analysis was performed with a T7E1 assay and PCR-based  
140 sequencing of 14 predicted sites (7 for each gRNA, Table S2). These showed no mutation  
141 events in retinas collected 1M after MMEJ vector injection (Fig. S5). In these sites, whole  
142 genome sequencing of 4 retinas of 4 mice collected 1M post-injection (average read depth  
143 of 158 per base) and an additional 3 retinas of 3 mice collected 4M post-injection (average  
144 read depth of 126 per base) revealed no off-target events (Table S3). In addition, we listed



145 up additional 59 potential off-target sites in an unbiased manner, by selecting all variants in  
146 whole genome sequence data that were present in 3 independent samples collected after  
147 the therapeutic transfection of murine Neuro2A cells, but were not present in a single  
148 sample collected before transfection (Table. S3). No indels were observed in these sites  
149 using the whole genome sequence data from the 7 retinas also used for the on-target  
150 analysis (average read depth of 219 per site). Furthermore, there was no evidence of AAV  
151 integration into the mouse genome outside of the on-target site. Together, these results  
152 indicate that off-target indel formation was rare, if it occurred at all.

153           Next, we investigated the therapeutic effects of MMEJ-mediated mutation  
154 replacement. Light sensitivity in the visual cortex was assessed with flash visually evoked  
155 potentials (fVEPs). Surprisingly, cortical responses contralateral to the treated eye revealed  
156 a ~10,000-fold (range: 1,000 – 100,000-fold) improvement in light sensitivity, equivalent to  
157 gene supplementation in ~70% of the photoreceptors (Fig. 3a, S1f, S3h, and S6a) with  
158 greater ERG rescue (Fig. S6b,c).<sup>16</sup> Changes in light-induced behavior (fear conditioning, Fig.  
159 3b) also reflected this improvement. Furthermore, cortical responses to phase-reversal  
160 gratings of various spatial resolutions, i.e., the pattern VEP (pVEP), showed larger  
161 amplitudes post-treatment (Fig. 3c). The threshold of spatial resolution of vision (i.e., visual  
162 acuity), determined by measuring the optokinetic response (OKR), was restored in the

163 treated mice to 59.1% of the control mice, also similar to the effect of gene supplementation  
164 (Fig. 3d). Taken together, MMEJ-mediated *Gnat1* mutation replacement allowed substantial  
165 improvement of light sensitivity and visual acuity, comparable to the effects delivered by  
166 gene supplementation.

167 We also used MMEJ-mediated mutation replacement to treat 2M-old *Gnat1*<sup>IRD2/IRD2</sup>  
168 mice, which retain cone function and serve as a model of human retinal dystrophy.<sup>22</sup> In the  
169 early course of the disease, patients suffer from severe loss of light sensitivity with  
170 preserved visual acuity.<sup>22</sup> A histological analysis showed scattered GNAT1-positive  
171 photoreceptors in the treated mice (Fig. 4a). RT-PCR measurement indicated that absolute  
172 genome editing efficiency was 7.2% (Fig. S7a). The fVEP analysis showed a ~1,000-fold  
173 increase in light sensitivity (Fig. 4b). This was confirmed behaviorally in a fear conditioning  
174 experiment (Fig. 4c). However, the improvement in retinal function could not be isolated  
175 from preexisting cone function by ERG testing, and visual acuity remained unchanged in  
176 pVEP and OKR testing (Fig. S7b-d). These results show that the therapeutic effects of our  
177 platform extended to an animal model of human disease.

178

179 **Discussion**

180           This study shows that mutation replacement genome editing with a single AAV  
181 vector can achieve striking improvements in light sensitivity and visual acuity comparable to  
182 that of gene supplementation.<sup>16</sup> The results showed that the gene supplementation can treat  
183 by far a larger number of retinal neurons compared to the mutation replacement genome  
184 editing, resulting in substantially larger ERG responses directly proportional to the increased  
185 number of light-responsive photoreceptors in the former. However, the light sensitivity as  
186 defined by dimmest recognizable light stimulus and visual acuity was not very different  
187 between the two treatment approaches (Figure 3a right lower panel). This is because  
188 thresholds of these visual perceptions reflect functional integrity of defined number of  
189 photoreceptors rather the total number of treated retinal neurons.

190           This therapeutic platform renders a major step forward from the dual vector-based  
191 mutation replacements, which generally yield an absolute editing efficiency of less than  
192 ~5%<sup>10, 11, 12</sup> in post-mitotic cells, including 4.5% efficiency at the level of mRNA in the retinal  
193 pigment epithelium in a rat model of retinal dystrophy,<sup>9</sup> compared to the efficiency of up to  
194 ~10% shown here by genomic, mRNA, and functional analysis. This paves the way for  
195 treating loss-of-function mutations in larger genes, for which conventional gene  
196 supplementation therapy or NHEJ-based genome editing strategies are not generally  
197 feasible.

198

199 **Methods**

200

201 **Animals**

202 *Pde6c*<sup>cpfl1/cpfl1</sup> *Gnat1*<sup>IRD2/IRD2</sup> mice (i.e., blind mice) were derived from *Gnat1*<sup>IRD2/IRD2</sup>

203 mice (Takeda, Japan),<sup>18</sup> which are rod-defective, and *Pde6c*<sup>cpfl1/cpfl1</sup> mice (Jackson

204 Laboratory, Bar Harbor, ME),<sup>23</sup> which are cone-defective. The phenotype of these mice has

205 been previously studied and reported.<sup>16</sup> For the *in vivo* reporter assay, an AAV vector (1 ×

206 10<sup>12</sup> gc mL<sup>-1</sup>) was injected (1.5 μ L per injection) into the ventral subretinal space of

207 3-month-old C57BL/6J mice (Japan SLC Inc., Hamamatsu, Japan) as previously reported.

208 <sup>24</sup> For mutation placement genome editing, the AAV vector (1 × 10<sup>12</sup> gc mL<sup>-1</sup>) was injected

209 (1.5 μ L per injection) into the dorsal and ventral subretinal space of

210 *Pde6c*<sup>cpfl1/cpfl1</sup> *Gnat1*<sup>IRD2/IRD2</sup> mice (6-month-old) and *Gnat1*<sup>IRD2/IRD2</sup> mice (2-month-old).

211 Control animals comprised age-matched *Pde6c*<sup>cpfl1/cpfl1</sup> mice or C57BL/6J mice (Japan SLC

212 Inc., Hamamatsu, Japan). The surgical procedures were performed after intraperitoneal

213 administration of a mixture of ketamine (37.5 mg kg<sup>-1</sup>) and medetomidine (0.63 mg kg<sup>-1</sup>). The

214 medetomidine was reversed by intraperitoneal administration of atipamezole (1.25 mg kg<sup>-1</sup>)

215 after the surgery. Sample sizes were calculated using an on-line sample size calculator

216 (<https://www.stat.ubc.ca/>) adopting a two-sided alpha-level of 0.05, 80% power. The  
217 parameters included the means and standard deviation predicted from a previous study we  
218 conducted with a similar experimental approach to evaluate effects of AAV-mediated gene  
219 supplementation therapy on a group of mice that had a similar genetic background.<sup>16</sup> Rarely,  
220 the sample size was limited by the availability of mice. The mice were handled in  
221 accordance with the ARVO Statement On the Use of Animals in Ophthalmic and Vision  
222 Research and the Tohoku University guidelines for the care and use of animals. All  
223 experimental procedures were conducted after approval by the relevant committee for  
224 animal experiments at Tohoku University Graduate School of Medicine.

225

#### 226 **Miniaturization of photoreceptor-specific promoter**

227 Various known small promoters (Table S1) were tested before deletion mutant  
228 promoters were synthesized by modifying the *RCV* promoter<sup>25</sup> or *GRK1* promoter<sup>26</sup> (Figure  
229 S1c, Thermo Fisher Scientific, Waltham, MA; Eurofins Genomics, Tokyo, Japan). They were  
230 each sub-cloned into a pAAV-MCS Promoterless Expression Vector (Cell Biolabs Inc., San  
231 Diego, CA) containing an enhanced green fluorescent protein (EGFP) gene as a reporter, as  
232 previously described.<sup>24, 27</sup> AAV2/8 containing the reporter constructs were generated and  
233 purified following the method described below. Each virus was injected into 2 eyes of

234 C57BL/6J mice. The eyes were collected 1 week after the injection and were processed for  
235 histological assessment as described below.

236

### 237 **Selection of gRNAs**

238 Three gRNAs each were designed using Cas-Designer  
239 (<http://www.rgenome.net/cas-designer/>) on both sides of the mutation in the intron 4 and  
240 exon 4 of *Gnat1*, as displayed in Figure S2 (Assembly: GRCm38/mm10). Oligos for each  
241 gRNA were subcloned with pX601 vector (gRNA expression plasmid, addgene #61591).  
242 Neuro2a cells (Cell Resource Center for Biomedical Research, Tohoku University, Sendai,  
243 Japan) were transfected with an gRNA expression plasmid using lipofectamine 3000  
244 transfection reagent (Thermo Fisher Scientific). Genomic DNA was extracted 72 hrs  
245 post-transfection using a DNA extraction kit (QIAamp DNA Mini kit; Qiagen, Hilden,  
246 Germany). This was subjected to a T7E1 assay following the manufacturer's instructions  
247 (New England Biolabs, Ipswich, MA). In brief, genomic fragments containing the gRNA  
248 target site were amplified with PCR and purified using NucleoSpin Gel and a PCR Clean-up  
249 kit (Macherey-Nagel, Düren, Germany). Then 200 ng of each of the PCR products derived  
250 from the transfected and non-transfected cells were denatured at 95° C for 5 min and  
251 reannealed, then digested with T7E1 for 30 min at 37° C, followed by electrophoresis in 2%

252 agarose gel. After measuring the density of the bands with ImageJ, %indels was calculated  
253 following the formula:  $100 \times (1 - (1 - \text{cleaved band intensity} / \text{total band intensities})^{1/2})$ .<sup>28</sup> The  
254 sequences of all the PCR primers used in this study are presented in Table S2.

255

### 256 **Construction and purification of plasmid and AAV vectors**

257 The all-in-one CRISPR/SaCas9 plasmid (pX601) for mutation replacement  
258 genome editing was assembled as shown in Fig. S1. The 93-bp *GRK1* promoter (*GRK1-93*)  
259 was used to drive SaCas9 (Ac. No. CCK74173.1; from pX601) expression. Oligonucleotides  
260 for the donor template, which comprised the flanking micro-homology arms, gRNA target  
261 sites and the donor sequence, were synthesized and inserted into the vector using a DNA  
262 ligation kit (Clontech, Mountain View, CA ). To avoid repeated cleavage after successful  
263 mutation replacement, mutations were introduced in the flanking gRNA target sites. The 4  
264 bp mutation in the 5' gRNA-1 target site inside exon 4 was selected using codon  
265 optimization tool GENEisu (<http://www.geneius.de/GENEius/>). For selecting 1 bp mutation in  
266 the 3' gRNA-4 target site, the corresponding genomic sequences from *Mus musculus*, *Mus*  
267 *Caloli*, *Mus phari* and *Rattus norvegicus* were aligned by ClustalW  
268 (<https://clustalw.ddbj.nig.ac.jp/>). The sequences were perfectly conserved except for a  
269 single variant in *Rattus norvegicus*, which was chosen for inducing mutation. Mutations at

270 both target sites were confirmed with off-target site analysis tool CRISPOR  
271 (<http://crispor.tefor.net/>) to yield lowest probability of cleavage (Cutting frequency  
272 determination score of 0.00). For labeling of SaCas9 expression, 2A peptide and mKO1  
273 (monomeric Kusabira-Orange 1) red fluorescence protein cDNA (MBL, Nagoya, Japan)  
274 were inserted downstream of SaCas9 into the vector using a NEBuilder HiFi assembly kit  
275 (New England Biolabs). For construction of plasmid used for cell sorting, MMEJ vector was  
276 modified so that 2A peptide and EGFP cDNA (Clontech) were inserted downstream of the  
277 SaCas9 driven by *CMV* promoter replaced for the *GRK1-93* promoter. The NoMHA (no  
278 mirohomology arm), NoTS (no target site) and HITI (homology-independent targeted  
279 integration) plasmids was assembled as shown in Fig. S1. Each fragment was synthesized  
280 and inserted into the vector using the same regents described above. We also constructed a  
281 plasmid vector for gene supplementation of *GNAT1* as previously described<sup>16</sup> (shown in  
282 Fig.S1h). In brief, full length *GNAT1* cDNA (KIEE3139; Promega Corp., Madison, WI) was  
283 subcloned downstream of the ubiquitous *CMV* promoter into the AAV-MCS vector (Cell  
284 Biolabs Inc).

285 Then, the constructed plasmid vectors were used for *in vitro* assays or assembled  
286 into AAV2/8. In brief, each vector was co-transfected with AAV2rep/AAV8cap vector (pdp8;  
287 Plasmid Factory, Bielefeld, Germany) in HEK293T cells (Thermo Fisher Scientific) using PEI



288 (Polysciences Inc, Warrington, PA). AAV particles was extracted in PBS and purified with an  
289 AKTA prime plus chromatography system (GE Healthcare, Chicago, IL) on an AVB  
290 Separose HP column (GE Healthcare), as previously described.<sup>24, 27</sup>

291

## 292 **RT-PCR**

293 RT-PCR was carried out as described previously.<sup>27</sup> Total RNA was purified from the  
294 mouse retinas using the miRNeasy plus mini kit (Qiagen) and reverse-transcribed with  
295 SuperScript III (Thermo Fisher Scientific). qRT-PCR was performed with an initial  
296 denaturation step at 95° C for 20 s, followed by 40 cycles at 95° C for 3 s and 60° C for 20 s  
297 (7500 Fast Real-Time PCR System; Thermo Fisher Scientific). Taqman probes for *Gnat1*  
298 (Mm01229120; Thermo Fisher Scientific), *Gapdh* (Mm99999915; Thermo Fisher Scientific),  
299 *Pde6b* (Mm00476679; Thermo Fisher Scientific), *Pkca* (Mm00440858; Thermo Fisher  
300 Scientific), *Rho* (Mm01184405; Thermo Fisher Scientific), *Rcvrn* (Mm00501325; Thermo  
301 Fisher Scientific) and *SaCas9* (AP2XCCY; Thermo Fisher Scientific) were used. For  
302 *SaCas9* and gRNA scaffold, primers and probes were designed and used as previously  
303 described.<sup>4</sup> Each mRNA expression was determined by plotting CT values on the standard  
304 curve generated by serially diluting the control sample (C57BL/6J mice retinal cDNA or AAV  
305 injected retinal cDNA).

306

307 **Western blot**

308           The eyes were harvested 6 weeks (1.5M) after the AAV injection. The retina and  
309 RPE/choroid complex were then collected separately and placed on ice. The tissues were  
310 dissolved in RIPA buffer and the total protein concentration was measured with a Pierce  
311 BCA protein assay kit (Thermo Fisher Scientific). Proteins (15 µg each) were separated  
312 based on their molecular weight with SDS–PAGE on 10% Mini-PROTEAN gels (Bio-Rad,  
313 Hercules, CA) and then transferred to PVDF membranes (Millipore, Billerica, MA).  
314 Membranes were blocked with 5% skim milk for 1 hr, incubated with rabbit anti-GFP  
315 antibody (#598, 1/2500; MBL) for 1 hr, and then incubated with horseradish peroxidase  
316 (HRP)-conjugated anti-rabbit IgG antibodies (A0545, 1/2000; Sigma-Aldrich) for 1 hr. The  
317 immunogenic signal was detected with ECL prime (GE Healthcare). The membrane was  
318 stripped and incubated with anti-beta-actin (F5316, 1/2000; Sigma-Aldrich, St. Louis, MO),  
319 incubated with HRP-conjugated anti-mouse antibodies (#31430, 1/2000; Thermo Fisher  
320 Scientific), and detected with ECL prime.

321

322 **Immunohistochemistry**

323           Immunohistochemistry was performed as described previously.<sup>27</sup> Six weeks (1.5M)

324 after the AAV injection, the eyes were fixed in 4% paraformaldehyde. They were then either  
325 embedded in OCT compound and sectioned using a cryostat to generate retinal sections, or  
326 the RPE/choroid complex was separated from the retina and then flattened by creating 4  
327 incisions from the periphery to the optic nerve, thereby resulting in a clover-shaped  
328 RPE/choroid flatmount. The retinal sections were blocked with 5% normal goat serum for 30  
329 min, incubated with mouse anti-mKO1 monoclonal antibodies (M104-3M, 1/200; MBL),  
330 rabbit anti-M-opsin antibodies (AB5405, 1/1000; Millipore) or rabbit anti-recoverin (AB5585,  
331 1/5000; Millipore) and Alexa Fluor 488 conjugated PNA (10 µg/mL, Thermo Fisher scientific)  
332 for 1hr, incubated with Alexa Fluo 568-conjugated anti-mouse IgG antibodies (1/500;  
333 Thermo Fisher Scientific) or Alexa Fluo 568-conjugated anti-rabbit IgG antibodies (1/500;  
334 Thermo Fisher Scientific) for for 1hr, and DAPI (Vector Labs, Burlingame CA) for additional  
335 45 min. For the reporter assay, RPE/choroid flat mounts were stained with only DAPI for 45  
336 min before imaging. For the analysis of GNAT1 expression, immunohistochemistry was  
337 carried out using a TSA Plus Fluorescein System (Perkin-Elmer, Waltham, MA, USA)  
338 following the manufacturer's instructions. In brief, the sections were blocked with 1% skim  
339 milk for 1 hr, incubated with rabbit anti-GNAT1 antibodies (ab74059, 1/200; Abcam,  
340 Cambridge, UK) for 1 hr, incubated with HRP-conjugated anti-rabbit IgG antibodies (A0545,  
341 1/2000; Sigma-Aldrich) for 1 hr, and then stained with TSA reagent and/or DAPI for an

342 additional 45 min. The retinal flat mounts were stained as previously described.<sup>29</sup> In brief,  
343 the isolated eyes were fixed in 4% paraformaldehyde. Then they were treated with 3  
344 freeze/thaw cycles. For the analysis of Gnat1 expression, the retinas were blocked with 1%  
345 skim milk for 1 hr, incubated with rabbit anti-GNAT1 antibodies (ab74059, 1/200; Abcam,  
346 Cambridge, UK) overnight, incubated with HRP-conjugated anti-rabbit IgG antibodies  
347 (A0545, 1/2000; Sigma-Aldrich) for 1 hr, and then stained with TSA reagent (Perkin-Elmer).  
348 For the analysis of mKO1 expression, the retinas were blocked with 5% normal goat serum  
349 for 1 hr, incubated with mouse anti-mKO1 monoclonal antibodies (M104-3M, 1/200; MBL)  
350 overnight, incubated with Alexa Fluo 568-conjugated anti-mouse IgG antibodies (1/500;  
351 Thermo Fisher Scientific) for 1hr. Images were acquired on a Zeiss LSM780 confocal  
352 microscope (Carl Zeiss, Jena, Germany).

353

354

### 355 **Electrophysiological assessment**

356 Basic equipment and techniques for ERG and fVEP recordings were carried out as  
357 previously described.<sup>30</sup> Scotopic 6-Hz flicker ERGs were recorded following a previously  
358 published protocol<sup>31</sup> with modifications. We used flash intensities at 7 steps, ranging from  
359 -6.0 to 0 log.cd.s m<sup>-2</sup>, separated by 1.0 log units. For each step, after 10 seconds of

360 adaptation, 400 msec sweeps were recorded 50 times and averaged.

361 Standard single flash ERGs were recorded following a previously published  
362 protocol.<sup>16</sup> In brief, we used flash intensities comprising 10 steps, ranging from -7.0 to 2.0  
363 log.cd.s m<sup>-2</sup>, separated by 1.0 log units (Fig S6c). Then, the standard protocol was  
364 optimized for an accurate estimation of the small effect of MMEJ-mediated mutation  
365 replacement in *Pde6c*<sup>cpfl1/cpfl1</sup> *Gnat1*<sup>IRD2/IRD2</sup> mice, in which a fixed flash (1.0 log.cd.s m<sup>-2</sup>)  
366 separated by 10 sec intervals with increased averaging of 50 times (compared to 2 times in  
367 the standard protocol for this flash intensity) were applied (Fig. 1h). For assessing synaptic  
368 transmission between photoreceptor and ON-bipolar cells, group III mGlu agonist L-AP4  
369 (L-2-amino-4-phosphonobutyric acid, ab12002, 50 mM; Abcam) was injected into the  
370 vitreous of the mice at 3 W after treatment with MMEJ vector and ERGs were recorded  
371 before (to ensure successful mutation replacement) and 20hr after injection following the  
372 protocol described.<sup>20</sup>

373 Surgical implantation of the VEP electrodes was carried out as previously  
374 described<sup>30, 32</sup> 5 weeks post-injection, and recording was performed a week later. For  
375 recording fVEPs, we used flash intensities at 9 steps, ranging from -7.0 to 1.0 log.cd.s m<sup>-2</sup>,  
376 separated by 1.0 log units. The light sensitivity of the visual cortex was determined by  
377 identifying the dimmest light condition that yielded an amplitude of the negative trough

378 (P1-N1) or a positive peak (N1-P2) over 25  $\mu$ V during fVEP recording. To record pVEPs, we  
379 used black (3 cd m<sup>-2</sup>) and white (159 cd m<sup>-2</sup>) vertical stripes of equal width (average  
380 luminance: 81 cd m<sup>-2</sup>) with different spatial resolutions (0.42, 0.35, 0.28, 0.21, 0.14, 0.07,  
381 0.05, 0.03, 0.02 and 0.01 cycles per degree for the *Gnat1*<sup>IRD2/IRD</sup> mice, and 0.21, 0.14, 0.07,  
382 0.05, 0.03, 0.02 and 0.01 cycles per degree for the *Gnat1*<sup>IRD2/IRD2</sup>/*Pde6c*<sup>cpfl1/cpfl1</sup> mice), as  
383 described previously.<sup>32</sup> The amplitudes for the negative trough (P1-N1) and positive peak  
384 (N1-P2) were plotted vertically as a function of the log spatial resolution of the stimulus  
385 (horizontally).

386

### 387 **Behavioral tests**

388 Fear conditioning was performed 3 weeks after the AAV treatment, as previously  
389 described, with modifications.<sup>20</sup> In the training session, each mouse was placed in a shock  
390 chamber with a stainless-steel grid floor (21.5 cm width  $\times$  20.5 cm depth  $\times$  30 cm height  
391 box; Ohara Medical Industry, Tokyo, Japan), located inside a sound attenuating box, and left  
392 for 2 mins to adapt to the environment. Then, the mouse was exposed to an LED light cue  
393 (535 nm, 0.015 cd m<sup>-2</sup>, 2.0 Hz, 5.0 s) controlled via a stimulus controller (FZ-LU, Ohara  
394 Medical Industry) that co-terminated with a 0.8-mA foot shock (2.0-s duration). This was  
395 repeated 5 times at pseudorandomized intervals (70 - 140s) before returning the mouse to

396 the housing cage. In the testing session, which took place 24 hours after the training session,  
397 the mice were returned to the same chamber to test for visually-cued memory recall. In  
398 order to change the environmental context from the training session, a white floor and  
399 curved wall made of thin plastic were inserted into the chamber before the test. After placing  
400 the mice in the environmentally modified chamber, the mouse was allowed to adapt to the  
401 environment for 4.0 minutes before being shown the light cue, which persisted for 2.0  
402 minutes. The time spent freezing, as defined by an absence of movement ( $< 200$  pixels,  $>$   
403  $2.0$  s), was recorded by a built-in infrared video camera. The time spent freezing during the  
404  $2.0$  min immediately before and after presentation of the light cue was averaged using  
405 pre-installed imaging software (Ohara Medical Industry).

406 Visual acuity was measured 2 weeks after the AAV injection by observing the  
407 optokinetic responses of mice to rotating sinusoidal gratings presented on monitors  
408 (average luminance:  $62 \text{ cd m}^{-2}$ ) surrounding the mouse (Optomotry, Cerebral Mechanics,  
409 Lethbridge, Canada), as reported previously.<sup>16</sup> This test yields independent measures of  
410 right and left eye acuity based on the unequal sensitivities to pattern rotation direction, as  
411 the motion in the temporal-to-nasal direction dominates the tracking response.<sup>33</sup> Visual  
412 acuity data used in this study represented the averages of four trials conducted on four  
413 consecutive days. The results obtained by testing without using a mouse served as the

414 negative control.

415

416 ***In vitro* on-target assessment**

417 Neuro2a genomic DNA was extracted 72 hrs post-transfection using a DNA  
418 extraction kit (QIAamp DNA Mini kit). PCR products were sub-cloned into T-vector (pTAC2;  
419 BioDynamics, Tokyo, Japan), which was used to transform a DH5a-competent cell (Toyobo,  
420 Osaka, Japan). DNA from single colonies (>50 clones) were amplified by colony direct PCR.  
421 Each PCR fragment was sequenced following a standard procedure using an ABI3130  
422 genetic analyzer (Thermo Fisher Scientific), as described previously.<sup>34</sup>

423 For preparation of DNA samples used for *in vitro* analysis by whole genome  
424 sequencing, successfully transfected Neuro2a cells were used. In brief, Neuro2a cells were  
425 transfected with an SaCas9-2A-EGFP expression plasmid described above using  
426 lipofectamine 3000 transfection reagent (Thermo Fisher Scientific). After 72hrs,  
427 EGFP-positive cells were selected using FASC aria II cell sorter (BD Biosciences, Franklin  
428 lakes, NJ), and genomic DNA were extracted from these cells using DNA extraction kit  
429 (QIAamp DNA Mini kit).

430

431



432 ***In vivo* on-target and off-target assessment**

433           The on-target site and the 14 off-target sites (listed in Fig. S3 and Table S3,  
434 assembly: GRCm38/mm10) predicted by CRISPOR (<http://crispor.tefor.net/>) were amplified  
435 with PCR using the primers listed in Table S2. PCR products were subjected either to a  
436 T7E1 assay or Sanger sequencing of the PCR clones. We conducted a T7E1 assay for the  
437 14 off-target sites, as described above in detail. PCR products of the on-target site and  
438 the 14 off-target sites were sub-cloned into T-vector (pTAC2; BioDynamics, Tokyo, Japan),  
439 which was used to transform a DH5a-competent cell (Toyobo, Osaka, Japan). DNA from  
440 single colonies (>50 clones for the on-target site and >50 clones each for the off-target site)  
441 were amplified by colony direct PCR. Each on-target and/or off-target PCR fragment was  
442 sequenced following a standard procedure using an ABI3130 genetic analyzer (Thermo  
443 Fisher Scientific), as described previously.<sup>34</sup> Classifications of the sequenced clones are as  
444 follows: Success, mutation replaced as planned; Cleavage site indel, insertion or deletion in  
445 either gRNA cleavage site without replacement of *IRD2* mutation; AAV integration,  
446 unplanned insertion of AAV genome fragment; Deletion, simple excision of the *IRD2*  
447 mutation at the two gRNA cleavage sites without an insertion; Other indel, mutations that do  
448 not belong to any of the classifications above.

449

450 **Whole genome sequencing and assessment of off-target sites & AAV integration**

451 For the genomic DNAs extracted from Neuro2A and mice, we performed  
452 whole-genome sequencing using the NovaSeq 6000 (Illumina, San Diego, CA, USA)  
453 sequencer with 151 bp paired-end reads. The amount of data per sample was made to  
454 exceed at least 100G bases. The sequencing library was constructed using the TruSeq  
455 Nano DNA Library Prep Kit (Illumina) according to the manufacturer's instructions. We  
456 prepared two reference genomes, mouse reference genome (mm10) and mm10 plus AAV  
457 genome (mm10+AAV). The sequencing reads were separately aligned to mm10 and  
458 mm10+AAV using BWA-mem (ver.0.7.17). Then, PCR duplicate reads were marked using  
459 Picard tools (ver.2.17.8). Base quality scores were recalibrated using GATK (ver.4.1.2.0)  
460 according to the GATK Best Practices  
461 (<https://software.broadinstitute.org/gatk/best-practices/>).

462 Single nucleotide variants (SNVs) and short insertions and deletions (indels)  
463 calling were performed for the WGS data to assess off-target sites. To detect variants with  
464 low variant allele frequency (VAF), we used the GATK4 Mutect2 software, which is used for  
465 somatic variant calling. The variants were called according to the GATK Best Practices.  
466 Untransfected cells and untreated mouse data were used as normal control samples data in  
467 the Mutect2 variant calling.

468           In addition, to investigate whether integrations of the AAV occurred in the mice  
469 genome, we identified sequencing reads that were partially mapped (soft-clipped) to the  
470 AAV genome. From those sequencing reads, we extracted the subset of reads that were  
471 also partially mapped to the mouse genome (mm10). The extracted reads were evaluated  
472 for the presence of regions in which the AAV genome was inserted into the mouse genome.

473

#### 474 **Determination of editing efficiency**

475           Absolute editing efficiency among rods were estimated by dividing *Gnat1*  
476 expression (RT-PCR) in the treated retinas of *Pde6c<sup>cpfl1/cpfl1</sup> Gnat1<sup>IRD2/IRD2</sup>* mice by that in the  
477 retinas of untreated *Pde6c<sup>cpfl1/cpfl1</sup>* mice born with wildtype copies of *Gnat1* (N = 4). Similarly,  
478 the efficiency was estimated by dividing the 6Hz ERG response amplitudes at -1.0 log.cd.s  
479  $m^{-2}$  in the treated eyes of *Pde6c<sup>cpfl1/cpfl1</sup> Gnat1<sup>IRD2/IRD2</sup>* mice by those in the untreated eyes of  
480 *Pde6c<sup>cpfl1/cpfl1</sup>* mice (41.5  $\mu V$ , average of 4 mice). When estimating the absolute efficiency by  
481 sequencing analysis of on-target site in an *in vivo* experiment, we corrected for the  
482 difference in detection efficiency (described below), arising from the difference in PCR  
483 amplicon size of the on-target site with an assumption that the difference in efficiency  
484 remains constant across various mixture of edited and unedited alleles. The proportion of  
485 rod photoreceptors among retinal cells were considered to be 0.75<sup>19</sup>, which were also used

486 to calculate genome editing efficacy among rods.

487 To determine the difference in detection efficiency of genome edited “success” allele (670  
488 bp amplicon) and unedited “mutant” *IRD2* allele (611 bp amplicon), 1:1 (50%) mixture  
489 (molecular ratio) of these alleles were PCR amplified, subcloned, and re-amplified by colony  
490 direct PCR in the same way as described in ***in vivo on-target and off-target assessment***.

491 The identity of the clones (N = 53) were determined by difference in the band size in  
492 agarose-gel electrophoresis. Against the expected sequence results of 26.5:26.5 clones,  
493 16:37 clones were observed for success:mutant, indicating under-representation of the  
494 former by a factor of  $16/26.5 = 0.60$ . This factor was 0.52 when competition between  
495 “Success” and even smaller “Deletion” (524 bp amplicon; the major editing outcome) was  
496 compared with a similar experiment (16:45 clones for success:deletion). In order to correct  
497 “Success” rate for unedited “mutant” *IRD2*, which comprised the major population of the  
498 clones analyzed, we carried out the same experiment to 1:19 (5%), 1:9 (10%), 1:4 (20%),  
499 and 1:1 (50%) mixture of “Success” and unedited “mutant” *IRD2* allele (molecular ratio)  
500 followed by linear regression analysis (intercept -0.154, slope 0.528). Using the results of  
501 regression analysis, we corrected only the rates of “Success” and unedited “mutant” *IRD2*  
502 allele. For example, observed absolute “Success” for MMEJ at 1 month was 0.047 (4.7%)  
503 then absolute corrected “Success” rate would be  $(4.7 + 0.154)/0.528 = \sim 9.185\%$ . The

504 calculation yields an underestimate of genome editing, as the “Success” represent the  
505 largest PCR amplicon, thus least efficiently detected, of all the other edited genomes.

506

#### 507 **Statistical analysis**

508 Differences between pairs of groups were assessed with the paired Student’s t-test  
509 (two-sided) for paired data and unpaired Student’s t-test (two-sided) for other data.

510 Differences between sets of three groups were assessed with an analysis of variance  
511 (ANOVA), followed by Tukey’s test as a post-hoc analysis. Linear regression analysis was  
512 carried out to generate Figure 2d. All statistical analysis was performed with JMP (SAS  
513 Institute, Cary, NC). All values are expressed as the mean  $\pm$  SEM.  $P < 0.05$  was considered  
514 statistically significant.

515

#### 516 **Data availability**

517 The source data underlying Figs 1d-h, 2b–h, 3a-d, 4b and c and Supplementary Figs 1d,f,  
518 2c, 5a, 6b, c and 7a-d are provided as a Source Data file. The datasets generated during  
519 and/or analyzed during the current study not listed in the Source Data file are available from  
520 the corresponding author on reasonable request.

521

522

523 **Reference**

- 524 1. Kumaran N, Michaelides M, Smith AJ, Ali RR, Bainbridge JW. Retinal gene therapy.  
525 *Br Med Bull*, (2018).  
526
- 527 2. Wu Z, Yang H, Colosi P. Effect of genome size on AAV vector packaging. *Mol Ther*  
528 **18**, 80-86 (2010).  
529
- 530 3. Koyanagi Y, *et al.* Genetic characteristics of retinitis pigmentosa in 1204 Japanese  
531 patients. *J Med Genet*, jmedgenet-2018-105691 (2019).  
532
- 533 4. Maeder ML, *et al.* Development of a gene-editing approach to restore vision loss in  
534 Leber congenital amaurosis type 10. *Nat Med* **25**, 229 (2019).  
535
- 536 5. Tsai YT, *et al.* Clustered Regularly Interspaced Short Palindromic Repeats-Based  
537 Genome Surgery for the Treatment of Autosomal Dominant Retinitis Pigmentosa.  
538 *Ophthalmology* **125**, 1421-1430 (2018).  
539
- 540 6. Yang S, *et al.* CRISPR/Cas9-mediated gene editing ameliorates neurotoxicity in

- 541 mouse model of Huntington's disease. *J Clin Invest* **127**, 2719-2724 (2017).
- 542
- 543 7. Gaj T, Ojala DS, Ekman FK, Byrne LC, Limsirichai P, Schaffer DV. In vivo genome  
544 editing improves motor function and extends survival in a mouse model of ALS.  
545 *Science advances* **3**, eaar3952 (2017).
- 546
- 547 8. Li P, *et al.* Allele-specific CRISPR-Cas9 genome editing of the single-base P23H  
548 mutation for rhodopsin-associated dominant retinitis pigmentosa. *The CRISPR*  
549 *Journal* **1**, 55-64 (2018).
- 550
- 551 9. Suzuki K, *et al.* In vivo genome editing via CRISPR/Cas9 mediated  
552 homology-independent targeted integration. *Nature* **540**, 144-149 (2016).
- 553
- 554 10. Yin H, *et al.* Therapeutic genome editing by combined viral and non-viral delivery of  
555 CRISPR system components in vivo. *Nat Biotechnol* **34**, 328 (2016).
- 556
- 557 11. Yin H, *et al.* Genome editing with Cas9 in adult mice corrects a disease mutation and  
558 phenotype. *Nat Biotechnol* **32**, 551 (2014).



559

560 12. Yang Y, *et al.* A dual AAV system enables the Cas9-mediated correction of a  
561 metabolic liver disease in newborn mice. *Nat Biotechnol* **34**, 334 (2016).

562

563 13. Yao X, *et al.* CRISPR/Cas9–Mediated precise targeted integration in vivo using a  
564 double cut donor with short homology arms. *EBioMedicine* **20**, 19-26 (2017).

565

566 14. Nakade S, *et al.* Microhomology-mediated end-joining-dependent integration of  
567 donor DNA in cells and animals using TALENs and CRISPR/Cas9. *Nature*  
568 *communications* **5**, 5560 (2014).

569

570 15. Lamb TD. Evolution of phototransduction, vertebrate photoreceptors and retina.  
571 *Prog Retin Eye Res* **36**, 52-119 (2013).

572

573 16. Nishiguchi KM, *et al.* Retained Plasticity and Substantial Recovery of Rod-Mediated  
574 Visual Acuity at the Visual Cortex in Blind Adult Mice with Retinal Dystrophy. *Mol*  
575 *Ther* **26**, 2397-2406 (2018).

576

- 577 17. Allen AE, Cameron MA, Brown TM, Vugler AA, Lucas RJ. Visual responses in mice  
578 lacking critical components of all known retinal phototransduction cascades. *PLoS*  
579 *One* **5**, e15063 (2010).
- 580
- 581 18. Miyamoto M, Aoki M, Hirai K, Sugimoto S, Kawasaki K, Imai R. A nonsense mutation  
582 in *Gnat1*, encoding the alpha subunit of rod transducin, in spontaneous mouse  
583 models of retinal dysfunction. *Exp Eye Res* **90**, 63-69 (2010).
- 584
- 585 19. Jeon C-J, Strettoi E, Masland RH. The major cell populations of the mouse retina. *J*  
586 *Neurosci* **18**, 8936-8946 (1998).
- 587
- 588 20. Nishiguchi KM, *et al.* Gene therapy restores vision in rd1 mice after removal of a  
589 confounding mutation in *Gpr179*. *Nature communications* **6**, 6006 (2015).
- 590
- 591 21. Fu Y, Yau K-W. Phototransduction in mouse rods and cones. *Pflügers*  
592 *Archiv-European Journal of Physiology* **454**, 805-819 (2007).
- 593
- 594 22. Carrigan M, Duignan E, Humphries P, Palfi A, Kenna PF, Farrar GJ. A novel

- 595 homozygous truncating GNAT1 mutation implicated in retinal degeneration. *Br J*  
596 *Ophthalmol* **100**, 495-500 (2016).
- 597
- 598 23. Chang B, *et al.* A homologous genetic basis of the murine cpfl1 mutant and human  
599 achromatopsia linked to mutations in the PDE6C gene. *Proc Natl Acad Sci U S A*  
600 **106**, 19581-19586 (2009).
- 601
- 602 24. Fujita K, *et al.* In vivo cellular imaging of various stress/response pathways using  
603 AAV following axonal injury in mice. *Sci Rep* **5**, 18141 (2015).
- 604
- 605 25. Wiechmann AF, Howard EW. Functional analysis of the human recoverin gene  
606 promoter. *Curr Eye Res* **26**, 25-32 (2003).
- 607
- 608 26. Khani SC, *et al.* AAV-mediated expression targeting of rod and cone photoreceptors  
609 with a human rhodopsin kinase promoter. *Invest Ophthalmol Vis Sci* **48**, 3954-3961  
610 (2007).
- 611
- 612 27. Fujita K, Nishiguchi KM, Shiga Y, Nakazawa T. Spatially and Temporally Regulated

- 613 NRF2 Gene Therapy Using Mcp-1 Promoter in Retinal Ganglion Cell Injury. *Mol*  
614 *Ther Methods Clin Dev* **5**, 130-141 (2017).
- 615
- 616 28. Ran FA, Hsu PD, Wright J, Agarwala V, Scott DA, Zhang F. Genome engineering  
617 using the CRISPR-Cas9 system. *Nat Protoc* **8**, 2281 (2013).
- 618
- 619 29. Nishiguchi KM, Kaneko H, Nakamura M, Kachi S, Terasaki H. Identification of  
620 photoreceptor precursors in the pars plana during ocular development and after  
621 retinal injury. *Invest Ophthalmol Vis Sci* **49**, 422-428 (2008).
- 622
- 623 30. Tomiyama Y, *et al.* Measurement of Electroretinograms and Visually Evoked  
624 Potentials in Awake Moving Mice. *PLoS One* **11**, e0156927 (2016).
- 625
- 626 31. Michalakis S, *et al.* Restoration of cone vision in the CNGA3<sup>-/-</sup> mouse model of  
627 congenital complete lack of cone photoreceptor function. *Mol Ther* **18**, 2057-2063  
628 (2010).
- 629
- 630 32. Tokashiki N, Nishiguchi KM, Fujita K, Sato K, Nakagawa Y, Nakazawa T. Reliable

631 detection of low visual acuity in mice with pattern visually evoked potentials. *Sci Rep*

632 **8**, 15948 (2018).

633

634 33. Douglas RM, Alam NM, Silver BD, McGill TJ, Tschetter WW, Prusky GT.

635 Independent visual threshold measurements in the two eyes of freely moving rats

636 and mice using a virtual-reality optokinetic system. *Vis Neurosci* **22**, 677-684 (2005).

637

638 34. Nishiguchi KM, *et al.* Whole genome sequencing in patients with retinitis pigmentosa

639 reveals pathogenic DNA structural changes and NEK2 as a new disease gene.

640 *Proceedings of the National Academy of Sciences* **110**, 16139-16144 (2013).

641

#### 642 **Acknowledgements**

643 We thank Ms Misane Uchiike for her help with the experiments and Professor Carlo Rivolta

644 for the critical comments on the manuscript. This work was supported in part by the Japan

645 Agency for Medical Research and Development (KMN, 18ek0109213h0002). The

646 manuscript was edited by a professional English editing service (Mr. Tim Hilts). We thank

647 the Biomedical Research Core of Tohoku University Graduate School of Medicine for

648 technical support.

649

650 **Author contributions**

651 KMN conceived and designed the experiments. KMN and KF performed the experiments

652 and analyzed the data. FM carried out *in silico* analysis. SK helped in vitro experiments.

653 KMN wrote the manuscript and KMN and TN obtained the funding.

654

655 **Competing financial interests**

656 KMN, KF, and TN are listed as inventors in a patent application related to this work. The

657 Departments of Advanced Ophthalmic Medicine and Ophthalmic Imaging and Information

658 Analytics are endowed departments, supported by an unrestricted grant from Senju

659 Pharmaceutical Co. (Osaka, Japan) and Topcon Co. Ltd. (Tokyo, Japan), respectively.

660 These funders had no role in the study design, data collection and analysis, decision to

661 publish, or preparation of the manuscript.

662

663

664

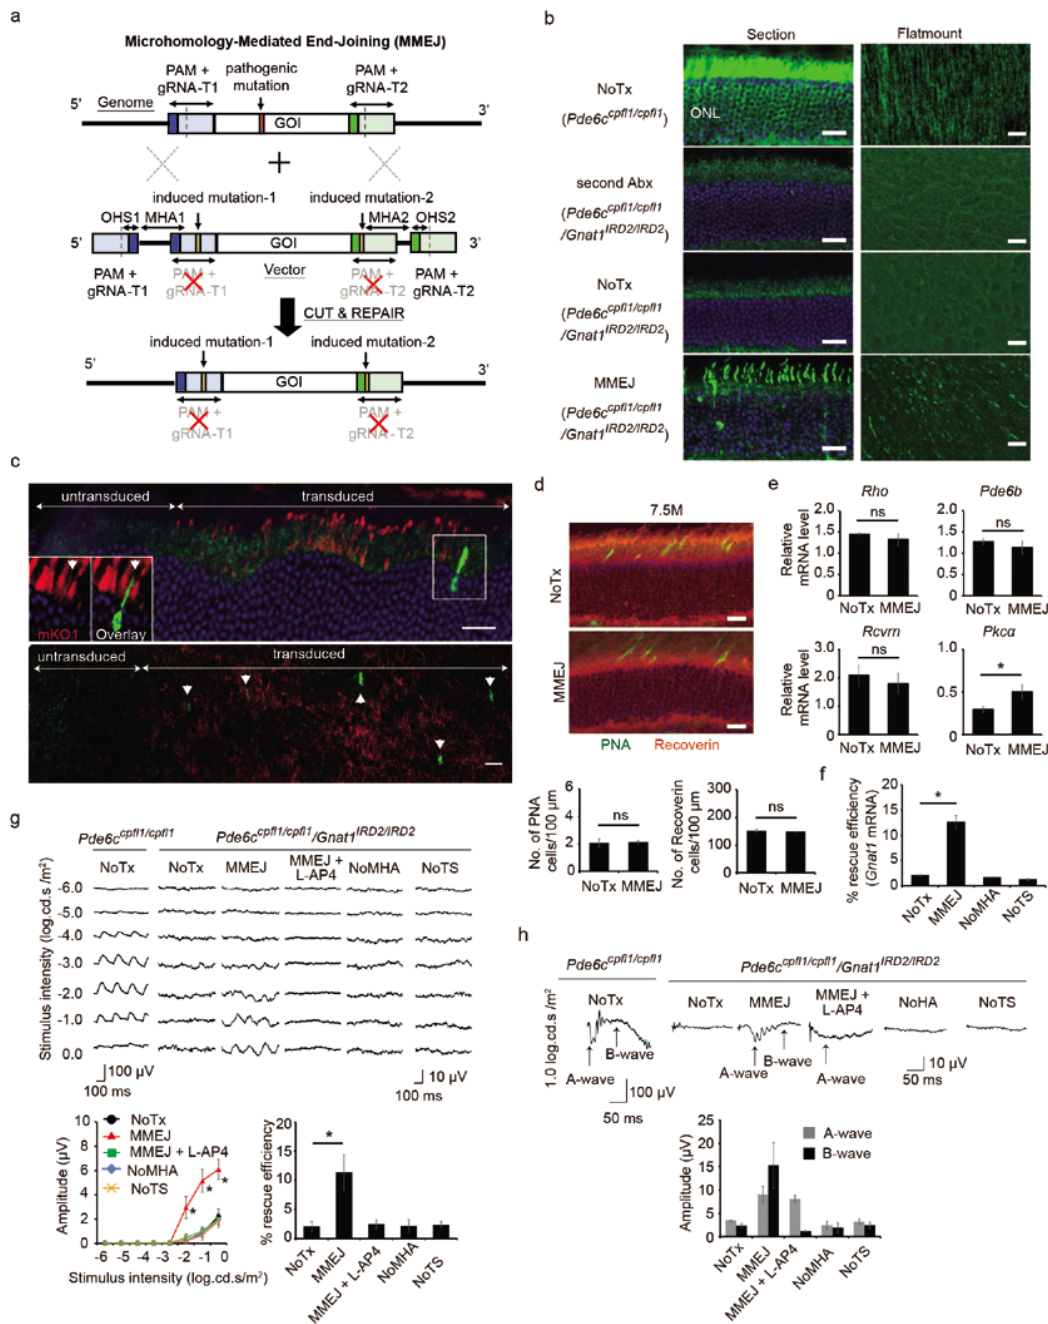

665

666 **Fig 1. In vivo characterization of mutation replacement genome editing in**

667 ***Pde6c<sup>cpfl1/cpfl1</sup>Gnat1<sup>IRD2/IRD2</sup>* mice**

668 **a.** Illustration of MMEJ-mediated mutation replacement. Genome of interest (GOI) with and  
669 without the mutation are excised at the flanking gRNA target sites (gRNA-T1 and -T2;  
670 dotted line) from mouse genome and AAV vector, respectively, by SaCas9 and two  
671 gRNAs. GOI without mutation is inserted into the genome using micro homology arms  
672 (MHA), thereby correcting the mutation. **b.** GNAT1 staining. GNAT1-positive  
673 photoreceptors (arrowhead) were observed (section, left; flatmount, right). **c.**  
674 Co-localization of Kusabira Orange (mKO1) probing SaCas9 expression and GNAT  
675 immunopositivity (inset). Scattered GNAT-positive cells were observed only in the area  
676 transduced with mKO1 (section, top; flatmount, bottom). Note, oversized reporter vector  
677 (5,201 bp) drastically reduced editing efficiency. N = 4 **d.** PNA and recoverin staining  
678 with quantification. **e.** RT-PCR of *Rho*, *Pde6b*, *Rcvrn*, and *Pkca* (relative to *Pde6c*<sup>cpfl1/cpfl1</sup>  
679 mice; N = 4 for all). **f.** Rescue efficiency by RT-PCR of *Gnat1* (relative to *Pde6c*<sup>cpfl1/cpfl1</sup>  
680 mice; N = 4 for all). **g.** 6-Hz flicker ERGs. N = 9, 9, 4, 4, and 4 for No treatment (NoTx),  
681 MMEJ, MMEJ+L-AP4, NoMHA, NoTS, respectively. In MMEJ+L-AP4, MMEJ vector and  
682 L-AP4 were sequentially injected. Amplitudes (1.0 log.cd.s./m<sup>2</sup>) relative to those of  
683 *Pde6c*<sup>cpfl1/cpfl1</sup> mice indicate %rescue efficiency (bottom right). **h.** Single flash ERGs. The  
684 same group of mice used in **g**. Scale bar: 20 μm; Data represent mean ± S.E.M.; \*P <  
685 0.05; ns, not significant; PAM, protospacer



686 b. adjacent motif, OHS, over-hanging sequence; Abx, antibodies; NoTS, no gRNA target

687 sites.

688

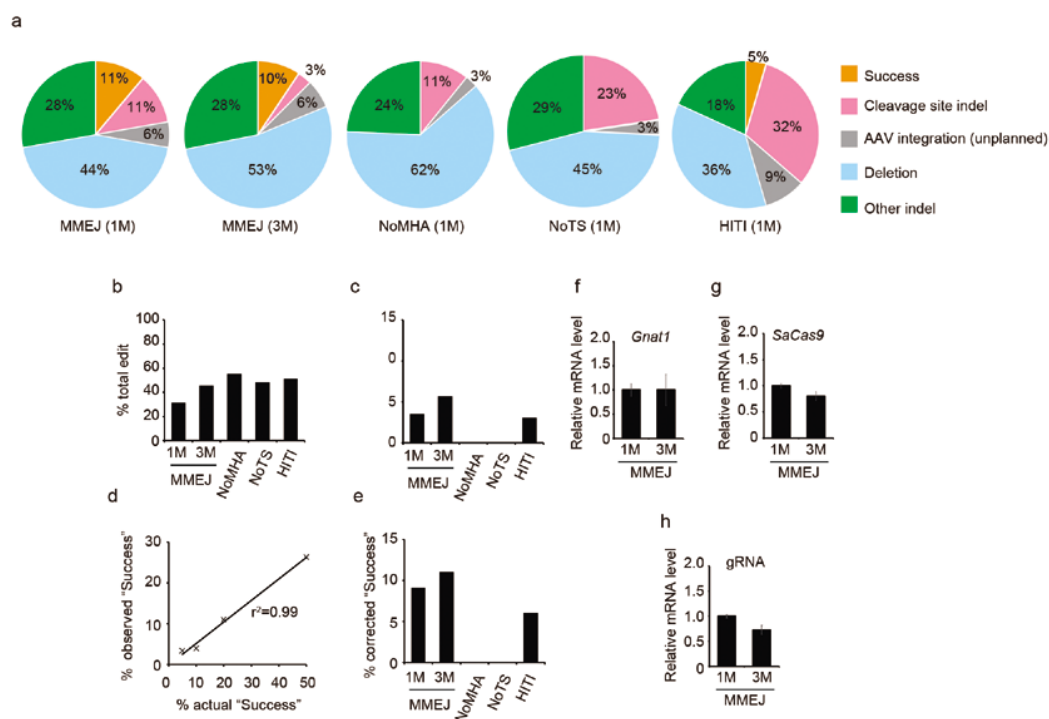

689

690 **Fig 2. In vivo assessment of the on-target site following mutation replacement**

691 **therapy in *Pde6c*<sup>cpfl1/cpfl1</sup> *Gnat1*<sup>IRD2/IRD2</sup> mice**

692 a. Breakup of sequencing results of the on-target site in the genome edited clones amplified

693 from the retina collected 1M or 3M post-injection. MMEJ, NoMHA, and NoTS represents

694 injection of prototype MMEJ vector, MMEJ vector without microhomology arms, and MMEJ

695 vector without gRNA target sites, respectively. HITI represents homology-independent

696 targeted integration strategy. See Fig. S3 for vector map. Total clones sequenced were 57,

697 70, 67, 64 and 86 for MMEJ (1M), MMEJ (3M), NoMHA (1M), NoTS (1M), and HITI (1M),  
698 respectively. “Success” indicates successful mutation replacement. “Cleavage site indel”  
699 represents indels in either gRNA cleavage site without replacement of *IRD2* mutation (see  
700 Online Methods for detail). Note, co-existing mutation replacement and cleavage site indels,  
701 which is expected to occur as a consequence of repeated cleavage at the gRNA site was  
702 not observed. **b.** Total editing rate. Percentage of clones that showed any sign of genome  
703 editing among the total clones analyzed, which were obtained by subcloning PCR amplicons  
704 of the retinal genome of the treated eyes (using primer pairs shown in Figure S4a and Table  
705 S2). **c.** Absolute success rate in the rods, assuming the cells comprise 75% of retinal  
706 neurons. **d.** Estimation of detection efficiency of “Success” allele by subcloning and PCR.  
707 Observed % “Success” (vertical axis) were obtained by distinguishing the identity of the  
708 clones derived from PCR products amplified from mixture of “Success” and “Deletion” DNA  
709 templates at various ratio (horizontal axis). Total clones sequenced in this experiment were  
710 61, 52, 64 and 61 for 5%, 10%, 20%, and 50% mixtures (rate of “Success” DNA versus total  
711 DNA), respectively. Intercept = -0.154, slope = 0.528,  $r^2 = 0.99$ . **e.** Estimated absolute  
712 success rate in the rods corrected for by the detection efficiency of “Success” alleles relative  
713 to “Deletion allele” that comprised the major sequencing outcome in **a**, assuming 75% of  
714 retinal neurons are the rods. **f.** RT-PCR of *Gnat1* at 1M (N = 4) and 3M (N = 3). **g.** RT-PCR

715 of *SaCas9* at 1M (N = 4) and 3M (N = 3) post-injection. h. RT-PCR of gRNA at 1M (N = 4)

716 and 3M (N = 3) post-injection. Data represent the mean  $\pm$  S.E.M.; \* $P < 0.05$ .

717

718

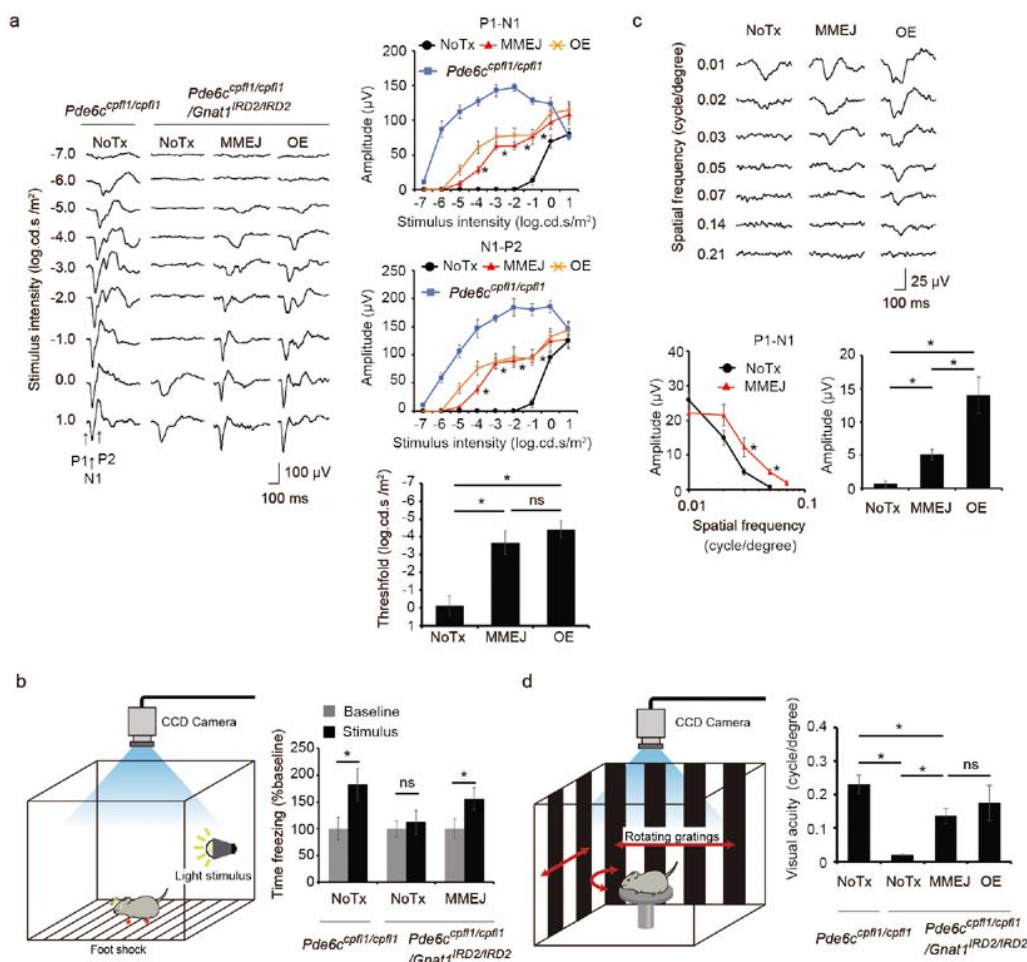

719

720 **Fig 3. Visual restoration by *in vivo* mutation-replacement genome editing in**

721 ***Pde6c*<sup>cpfl1/cpfl1</sup> *Gnat1*<sup>IRD2/IRD2</sup> mice**

722 **a.** Flash visually evoked potentials (fVEP) of the visual cortex contralateral to the eyes in  
723 response to flashes of various intensities. MMEJ indicates eyes treated with *Gnat1* mutation  
724 replacement (N = 9) and OE (over-expression) indicates those with *Gnat1* gene  
725 supplementation (N = 6), both delivered by single AAV. NoTx refers to untreated eyes (N =  
726 9). Control *Pde6c<sup>cpfl1/cpfl1</sup>* mice (N = 5). Note, light sensitivity as defined in the Methods was  
727 increased by ~4 log unit after MMEJ-mediated genome editing, which was not significantly  
728 different to the effect mediated by OE (right lower panel). **b.** Pattern VEPs. N = 11, and 10  
729 for MMEJ and untreated, respectively. **c.** Fear conditioning test. Freezing time before  
730 (Baseline) and during (Stimulus) presentation of fear-conditioned light cue from MMEJ  
731 treated (N = 9) and untreated (N = 6) mice. **i.** pVEPs from MMEJ treated (N = 9) and  
732 untreated (N = 5) mice. **d.** Optokinetic response. Note threshold of spatial resolution of  
733 vision (visual acuity) was not different in the MMEJ and OE. N = 10, 7, and 4 for MMEJ, OE,  
734 and NoTx, respectively. Control *Pde6c<sup>cpfl1/cpfl1</sup>* mice (N = 6). Data represent the mean ±  
735 S.E.M.; \*P < 0.05; nd, non-detectable; ns, not significant.

736

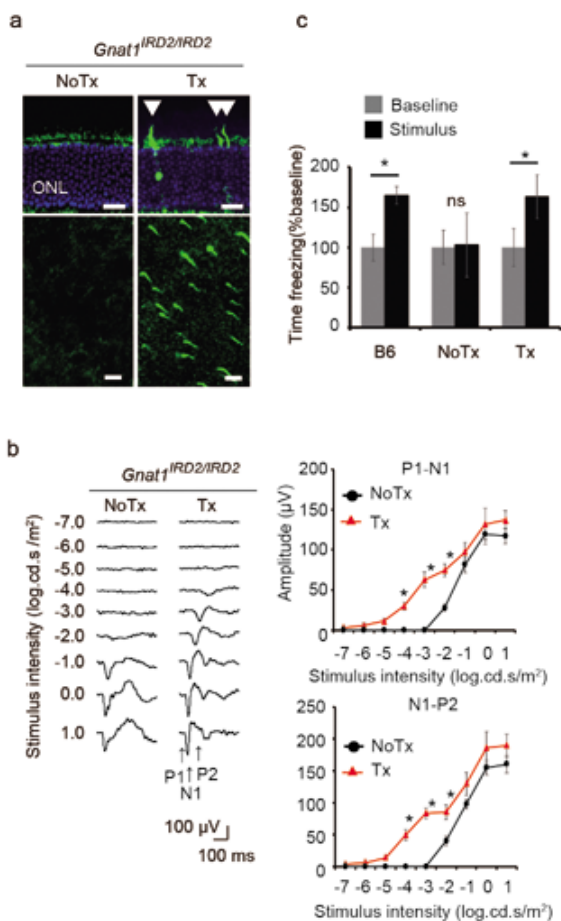

737

738 **Fig 4. *In vivo* mutation replacement genome editing in a mouse model of retinal**

739 **degeneration**

740 **a.** GNAT1-positive photoreceptors (arrowhead) following treatment of *Gnat1*<sup>IRD2/IRD2</sup> mice

741 shown in a retinal section (top) and a flatmount (bottom). Scale bar: 20  $\mu$ m. **b.** fVEPs

742 recorded from contralateral visual cortices in treated and untreated eyes of the same mice.

743 (N = 7). **c.** Fear conditioning test, showing freezing time before (Baseline) and during

744 (Stimulus) presentation of fear-conditioned light cue. Treated (Tx, N = 7) and untreated

745 (NoTx, N = 6) *Gnat1*<sup>IRD2/IRD2</sup> mice and CL57B6 mice (B6, N = 6). Data represent the mean  $\pm$

746 S.E.M.; \*P < 0.05; ONL, outer nuclear layer. ns, not significant.

747
